# Supplementary material for: New Charge Transfer Complex between 4-Dimethylaminopyridine and DDQ: Synthesis, Spectroscopic Characterization, DNA Binding Analysis, and Density Functional Theory (DFT)/Time-Dependent DFT/Natural Transition Orbital Studies
Source: PubMed Central journal article supplement — ACS Omega. 2021 Dec 22;7(1):810–22. doi: 10.1021/acsomega.1c05464 (PMC8756788; doi:10.1021/acsomega.1c05464), 2021-12-22
Supplement: ao1c05464_si_001.pdf [file ao1c05464_si_001.pdf]

## Supplementary data

### Charge Transfer Complex between 4-Dimethylaminopyridine and DDQ: Synthesis, Spectroscopic Characterization, DNA Binding Analysis, and Density Functional Theory (DFT)/Time-Dependent DFT/Natural Transition Orbital Studies

Mahipal Varukolu<sup>1</sup>, Manojkumar Palnati<sup>1</sup>, Venkatesh Nampally<sup>1</sup>, Suresh Gangadhari<sup>1</sup>,  
Manaiiah Vadluri<sup>1</sup>, and Parthasarathy Tigulla<sup>1</sup> \*

<sup>1</sup>Department of Chemistry, Osmania University, Hyderabad-500007, Telangana, India.

\*Corresponding author

E-mail: [sarathychem@gmail.com](mailto:sarathychem@gmail.com)

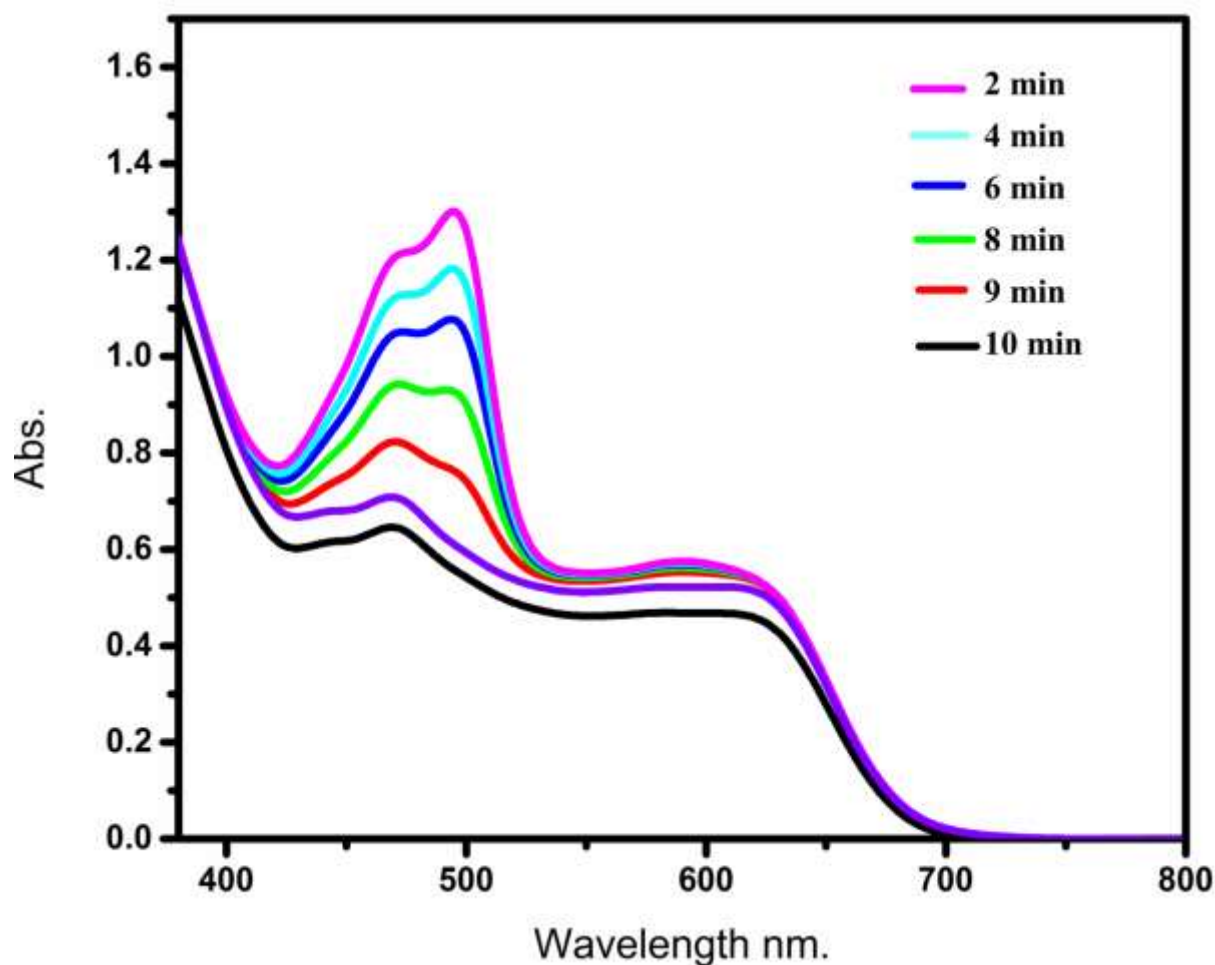

**Figure S1.** Effect of time on the stability of the formed complex

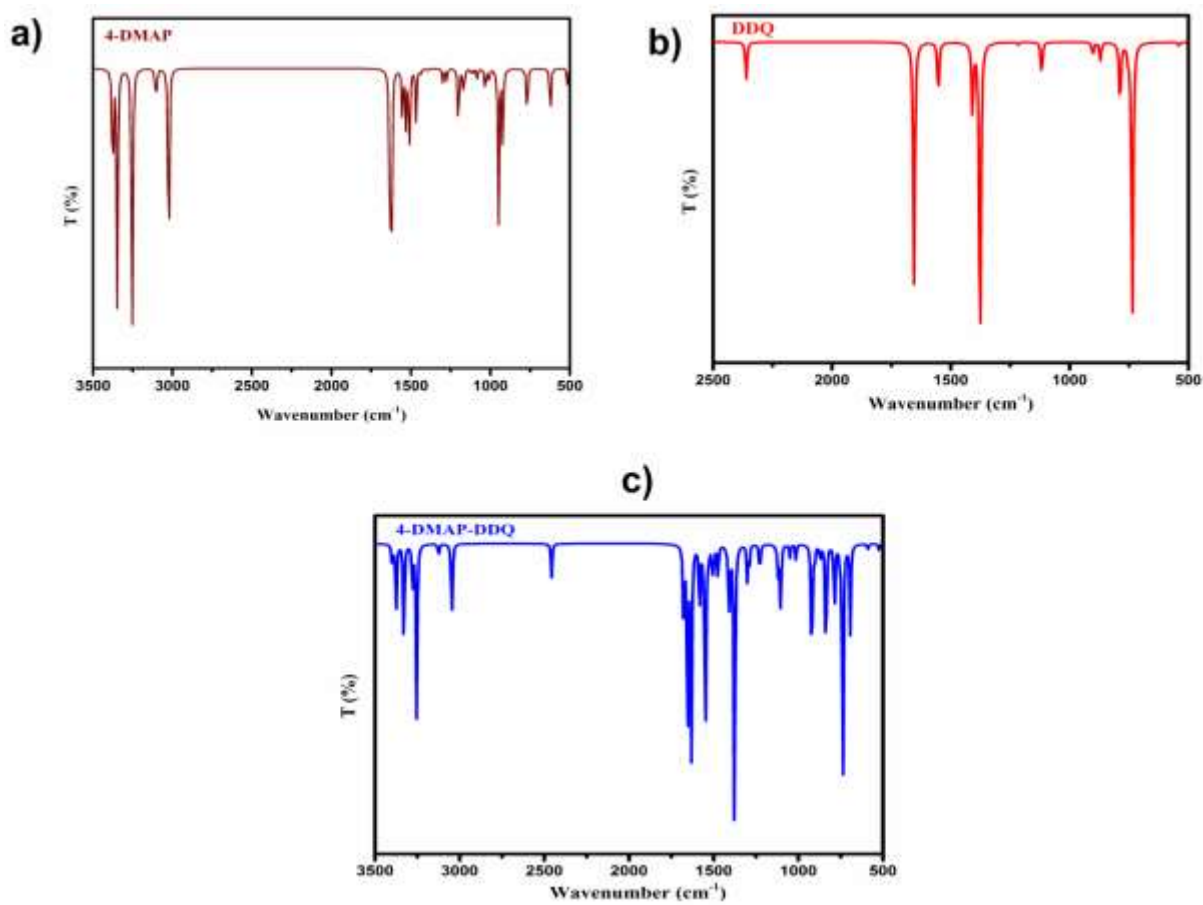

**Figure S2.** Calculated IR spectra of a) 4-DMAP, b) DDQ, and c) 4-DMAP-DDQ.

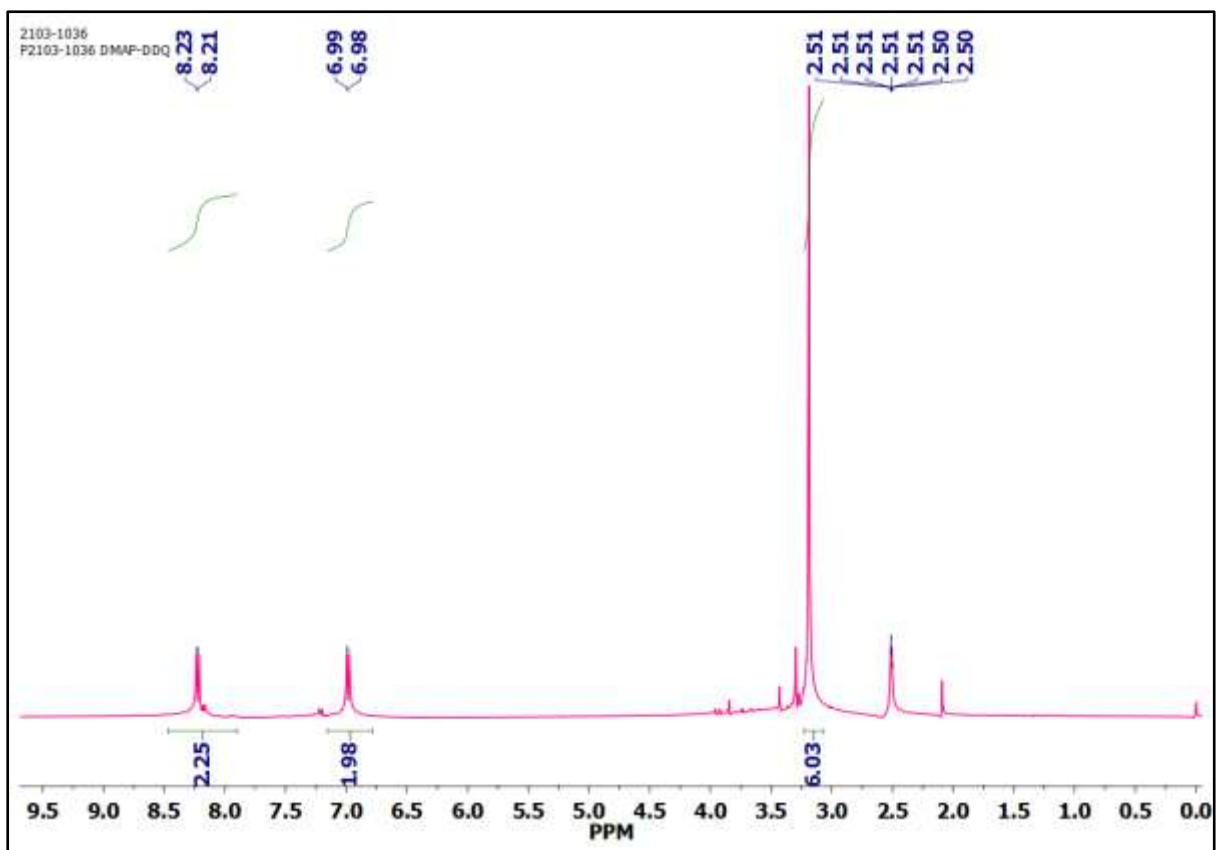

**Figure S3.**  $^1\text{H}$ -NMR spectra of CTC in  $\text{DMSO-d}_6$  (400 mhz).

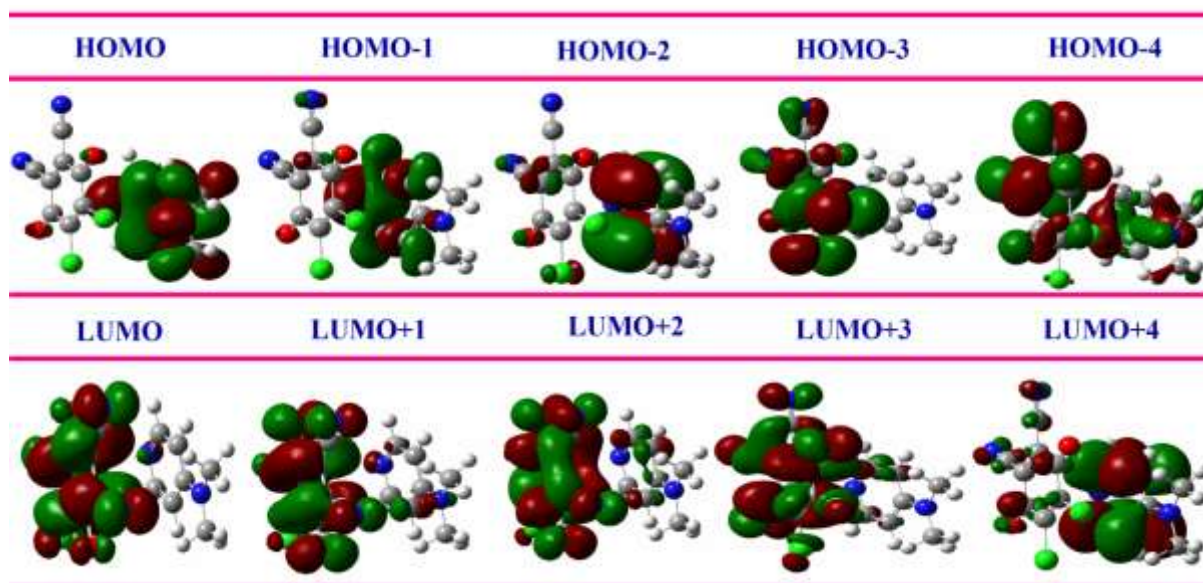

**Figure S4.** FMO pictures of CT-complex calculated by DFT (wB97XD).

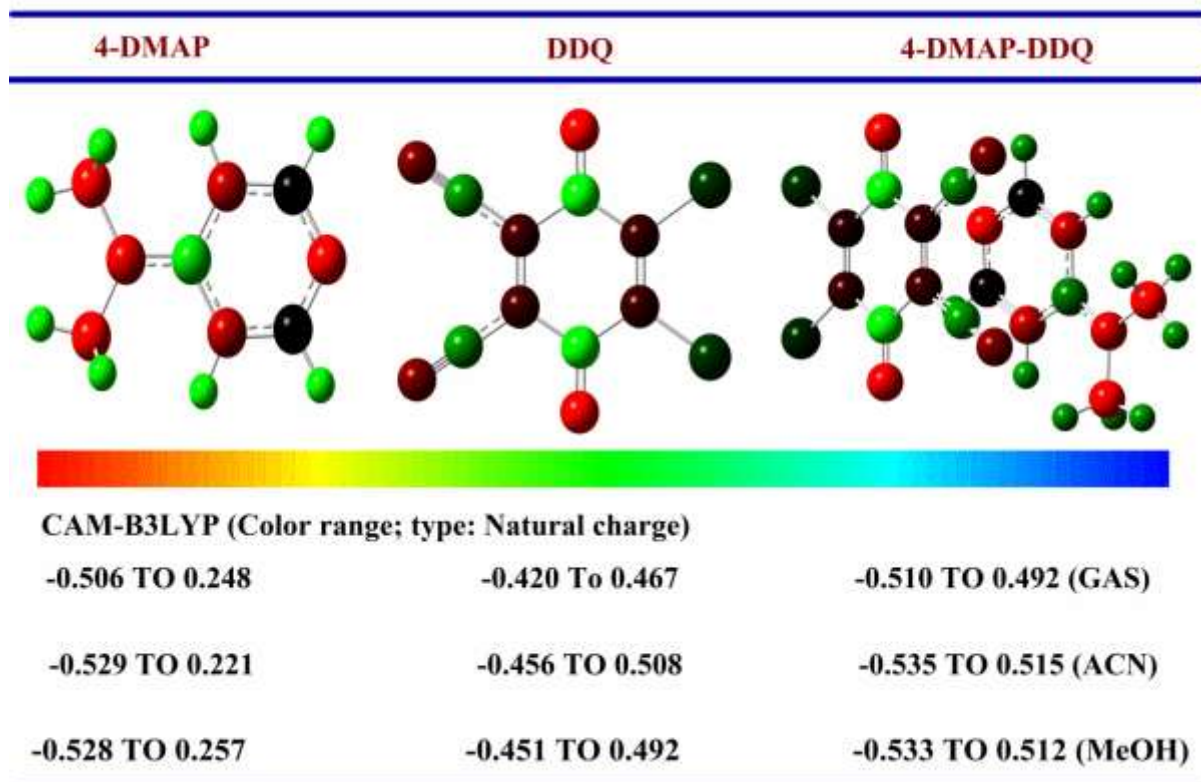

Figure S5. Natural atomic charge of CT complex

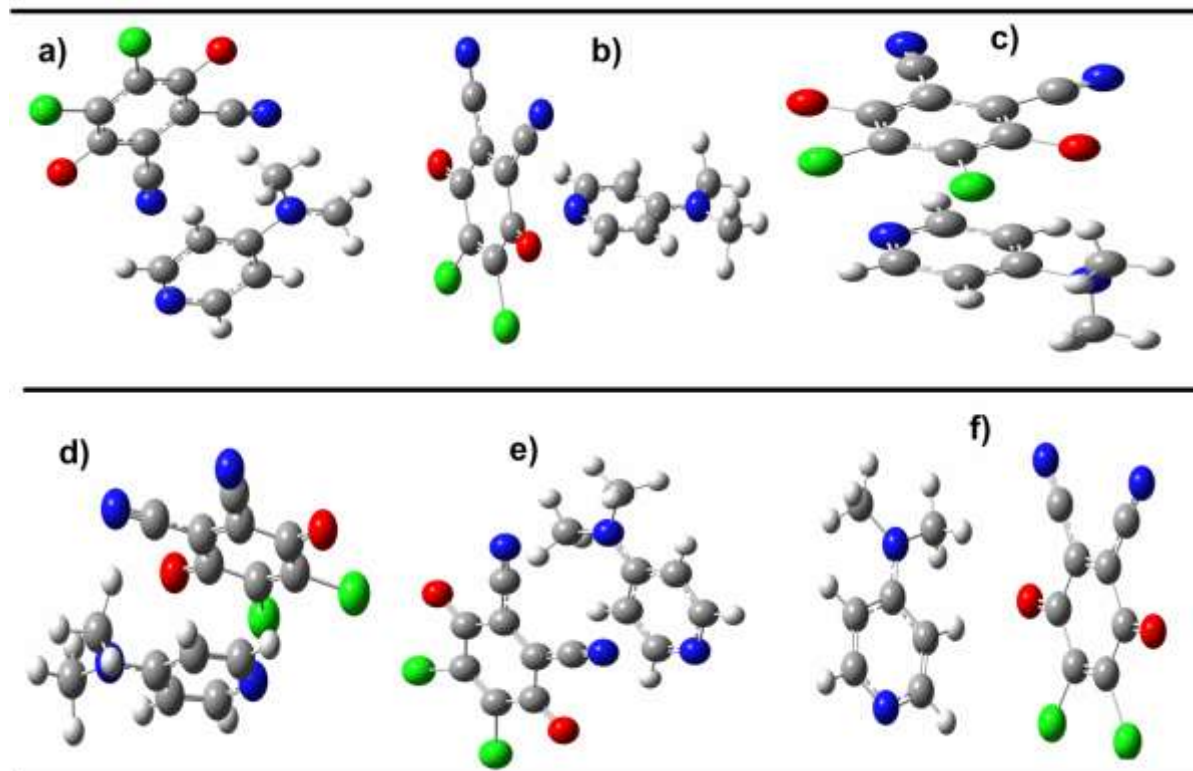

**Figure S6.** wB97XD optimized ground state geometric structure of the complex in gas phase. (a, c, d) Top view of 4-DMAP-DDQ CT complex. (e, f) Front view of 4-DMAP-DDQ CT complex. (b) Side view of 4-DMAP-DDQ CT complex.

**Table S1.** Elemental analysis by EDX spectroscopy

| Element | Experimental (%) | Theoretical (%) |
|---------|------------------|-----------------|
| C       | 51.51            | 51.60           |
| Cl      | 20.19            | 20.31           |
| N       | 16.01            | 16.01           |
| O       | 9.15             | 9.15            |

**Table S2.** Optimized bond length values of 4-DMAP, DDQ and CT-complex

| Bond length (Å <sup>0</sup> ) | 4-DMAP | DDQ   | CTC   |       |       |
|-------------------------------|--------|-------|-------|-------|-------|
|                               |        |       | Gas   | ACN   | MeOH  |
| C1-C2                         | 1.362  |       | 1.386 | 1.387 | 1.386 |
| C2-C3                         | 1.454  |       | 1.419 | 1.414 | 1.414 |
| C3-C4                         | 1.454  |       | 1.415 | 1.417 | 1.417 |
| C4-C5                         | 1.374  |       | 1.386 | 1.383 | 1.383 |
| C5-N6                         | 1.375  |       | 1.355 | 1.353 | 1.355 |
| C1-N6                         | 1.375  |       | 1.349 | 1.352 | 1.352 |
| C3-N11                        | 1.415  |       | 1.369 | 1.371 | 1.373 |
| C16-N11                       | 1.455  |       | 1.463 | 1.459 | 1.460 |
| C12-N11                       | 1.464  |       | 1.462 | 1.460 | 1.461 |
| C1-C2                         |        | 1.495 | 1.489 | 1.488 | 1.489 |
| C2-C3                         |        | 1.484 | 1.479 | 1.478 | 1.477 |
| C3-C4                         |        | 1.347 | 1.338 | 1.337 | 1.338 |
| C4-C5                         |        | 1.485 | 1.480 | 1.482 | 1.479 |
| C5-C6                         |        | 1.498 | 1.494 | 1.491 | 1.493 |
| C1-C6                         |        | 1.363 | 1.356 | 1.357 | 1.352 |
| C5-O7                         |        | 1.26  | 1.252 | 1.253 | 1.255 |
| C2-O8                         |        | 1.26  | 1.252 | 1.254 | 1.252 |
| C3-Cl10                       |        | 1.781 | 1.773 | 1.769 | 1.768 |
| C4-Cl9                        |        | 1.781 | 1.766 | 1.768 | 1.767 |
| C1-C12                        |        | 1.425 | 1.433 | 1.432 | 1.434 |
| C12-N14                       |        | 1.174 | 1.166 | 1.167 | 1.164 |
| C6-C11                        |        | 1.421 | 1.421 | 1.421 | 1.420 |
| C11-N13                       |        | 1.176 | 1.167 | 1.163 | 1.164 |

**Table S3.** Optimized bond angle values of 4-DMAP, DDQ and CTC-complex

| Bond angles<br>(A <sup>0</sup> ) | 4-DMAP | DDQ   |       |       | CTC   |     |      |
|----------------------------------|--------|-------|-------|-------|-------|-----|------|
|                                  |        | Gas   | ACN   | MeOH  | Gas   | ACN | MeOH |
| C1-C2-C3                         | 117.8  |       | 119.3 | 119.3 | 119.4 |     |      |
| C2-C3-C4                         | 115.5  |       | 116.3 | 116.4 | 116.1 |     |      |
| C3-C4-C5                         | 118.5  |       | 119.7 | 119.6 | 119.1 |     |      |
| C4-C5-N6                         | 125.3  |       | 124   | 124.6 | 124.4 |     |      |
| C5-N6-C1                         | 115    |       | 116.6 | 116.3 | 116.3 |     |      |
| C2-C1-N6                         | 125.7  |       | 124.3 | 124.4 | 124.5 |     |      |
| C3-N11-C12                       | 120.5  |       | 120.4 | 120.6 | 120.6 |     |      |
| C3-N11-C16                       | 119.7  |       | 120.2 | 120.1 | 120.2 |     |      |
| C12-N11-C16                      | 120.6  |       | 119.6 | 119.5 | 119.7 |     |      |
| C1-C2-C3                         |        | 117.6 | 116.3 | 116.6 | 116.3 |     |      |
| C2-C3-C4                         |        | 121.8 | 121.3 | 121.7 | 121.7 |     |      |
| C3-C4-C5                         |        | 121.5 | 121.8 | 121.3 | 121.4 |     |      |
| C4-C5-C6                         |        | 117.1 | 117.8 | 117.9 | 117.7 |     |      |
| C5-C6-C1                         |        | 121.4 | 120.3 | 120.2 | 120.4 |     |      |
| C1-C2-O8                         |        | 120.5 | 121   | 121.4 | 121.5 |     |      |
| C3-C2-O8                         |        | 122.1 | 122.4 | 122.5 | 122.3 |     |      |
| C4-C5-O7                         |        | 122.6 | 120.4 | 122.6 | 122.7 |     |      |
| C6-C5-O7                         |        | 120.5 | 121.7 | 121.6 | 121.7 |     |      |
| C2-C3-C110                       |        | 115.1 | 115.4 | 115.3 | 115.1 |     |      |
| C4-C3-C110                       |        | 122.9 | 122.9 | 123.4 | 123.8 |     |      |
| C3-C4-C19                        |        | 122.9 | 123.1 | 123.4 | 123.6 |     |      |
| C5-C4-C19                        |        | 115.1 | 115.3 | 115.6 | 115.2 |     |      |
| C2-C1-C12                        |        | 116.7 | 115.7 | 115.2 | 115.5 |     |      |
| C6-C1-C12                        |        | 122.7 | 121.1 | 121.4 | 121.3 |     |      |
| C5-C6-C11                        |        | 116.7 | 115.7 | 115.4 | 115.1 |     |      |
| C1-C6-C11                        |        | 122.7 | 121.3 | 121.6 | 121.7 |     |      |

**Table S4.** Natural atomic charge of 4-DMAP, DDQ, and CT-complex calculated using the wB97XD function.

| Atom | 4-DMAP  | DDQ     | CTC     |         |         |
|------|---------|---------|---------|---------|---------|
|      |         |         | Gas     | ACN     | MeOH    |
| C1   | 0.00617 |         | -0.0182 | -0.0056 | -0.0056 |
| C2   | -0.3479 |         | -0.3415 | -0.3519 | -0.3527 |
| C3   | 0.2041  |         | 0.2119  | 0.2109  | 0.2115  |
| C4   | -0.3478 |         | -0.3461 | -0.3512 | -0.3521 |
| C5   | 0.0069  |         | -0.0041 | -0.0054 | -0.0059 |
| N6   | -0.4843 |         | -0.5262 | -0.5359 | -0.5357 |
| H7   | 0.2375  |         | 0.2467  | 0.2418  | 0.2411  |
| H8   | 0.2489  |         | 0.2611  | 0.2607  | 0.2599  |
| H9   | 0.2488  |         | 0.2626  | 0.2656  | 0.2652  |
| H10  | 0.2367  |         | 0.2539  | 0.2389  | 0.2406  |
| N11  | -0.4331 |         | -0.4264 | -0.4242 | -0.4247 |
| C12  | -0.5066 |         | -0.5085 | -0.5117 | -0.5114 |
| H13  | 0.2455  |         | 0.2384  | 0.2378  | 0.2368  |
| H14  | 0.2352  |         | 0.2514  | 0.2549  | 0.2533  |
| H15  | 0.2352  |         | 0.2467  | 0.2438  | 0.2479  |
| C16  | -0.5072 |         | -0.5099 | -0.5108 | -0.5108 |
| H17  | 0.2459  |         | 0.2446  | 0.2409  | 0.2405  |
| H18  | 0.2341  |         | 0.2524  | 0.2543  | 0.2573  |
| H19  | 0.2342  |         | 0.2391  | 0.2381  | 0.2386  |
|      |         |         |         |         |         |
| C1   |         | -0.1078 | -0.1129 | -0.0943 | -0.0946 |
| C2   |         | 0.4673  | 0.4861  | 0.5171  | 0.5159  |
| C3   |         | -0.0932 | -0.1029 | -0.0808 | -0.0809 |
| C4   |         | -0.0937 | -0.0739 | -0.0769 | -0.0788 |
| C5   |         | 0.4679  | 0.4932  | 0.5072  | 0.5071  |
| C6   |         | -0.1074 | -0.1023 | -0.0893 | -0.0893 |
| O8   |         | -0.4214 | -0.4470 | -0.4665 | -0.4671 |
| O7   |         | -0.4214 | -0.4372 | -0.4550 | -0.4546 |
| C110 |         | 0.0947  | 0.0728  | 0.0779  | 0.0772  |
| C19  |         | 0.0947  | 0.0865  | 0.0827  | 0.0845  |
| C12  |         | 0.2474  | 0.2629  | 0.2830  | 0.2944  |
| C11  |         | 0.2474  | 0.2608  | 0.2850  | 0.2892  |
| N14  |         | -0.1864 | -0.2301 | -0.2443 | -0.2529 |
| N13  |         | -0.1864 | -0.2466 | -0.2459 | -0.2472 |

**Table S5.** The reactivity parameters of 4-DMAP, DDQ, and CTC in gas phase, acetonitrile and methanol.

| Parameter              | 4-DMAP | DDQ    | CTC    |        |        |
|------------------------|--------|--------|--------|--------|--------|
|                        |        |        | Gas    | ACN    | MeOH   |
| $E_{\text{HOMO}}$ (eV) | -6.96  | -10.32 | -6.386 | -6.128 | -6.141 |
| $E_{\text{LUMO}}$ (eV) | 1.425  | -5.041 | -3.807 | -3.881 | -3.877 |
| I                      | 6.96   | 10.32  | 6.38   | 6.12   | 6.14   |
| A                      | -1.425 | 5.041  | 3.807  | 3.881  | 3.877  |
| $\eta$                 | 2.7675 | 2.64   | 1.286  | 1.119  | 1.131  |
| $\mu$                  | -4.192 | -7.681 | -5.093 | -5.00  | -5.00  |
| $\omega$               | 3.174  | 11.172 | 10.081 | 11.17  | 11.052 |
| $\sigma$               | 0.3613 | 0.3787 | 0.7776 | 0.8936 | 0.8841 |

1eV= 96.485 kJ mol<sup>-1</sup>



**Table S6.** Cartesian coordinates of CT complex.

| Symbol | X            | Y            | Z           |
|--------|--------------|--------------|-------------|
| C      | 0.000461070  | -0.002287811 | 0.000601419 |
| C      | -0.001762861 | -0.001339735 | 0.000860785 |
| C      | 0.000017942  | -0.006864873 | 0.000294368 |
| C      | -0.003221543 | 0.000528848  | 0.000363441 |
| C      | -0.000215909 | 0.003326746  | 0.000694308 |
| N      | 0.001114505  | 0.000637104  | 0.000596033 |
| H      | 0.001496960  | 0.001788145  | 0.000540586 |
| H      | -0.000020693 | 0.001983101  | 0.000553686 |
| H      | -0.001911383 | -0.001254853 | 0.000322453 |
| H      | 0.001352289  | -0.001642692 | 0.000279655 |
| N      | -0.010523909 | 0.011547038  | 0.001314359 |
| C      | 0.004276591  | -0.007226475 | 0.000797893 |
| H      | 0.000943939  | 0.005689257  | 0.002203863 |
| H      | 0.002966519  | 0.000111158  | 0.000556808 |
| H      | -0.000845371 | 0.000690866  | 0.008561909 |
| C      | 0.001767956  | -0.006356331 | 0.000875792 |
| H      | 0.000768637  | -0.002082728 | 0.003011242 |
| H      | 0.002682414  | -0.000208277 | 0.000780591 |
| H      | 0.000824571  | 0.003804763  | 0.004546963 |
| C      | 0.020493245  | -0.016171219 | 0.005041153 |
| C      | -0.020569134 | -0.018374318 | 0.004815963 |
| C      | -0.035972544 | 0.005542201  | 0.003219001 |
| C      | -0.019270602 | 0.011224049  | 0.003508754 |
| C      | 0.020601255  | 0.010141883  | 0.002846834 |
| C      | 0.048183408  | 0.000776103  | 0.000473892 |
| O      | 0.062338198  | -0.004090934 | 0.001966680 |
| O      | -0.075881686 | 0.001935135  | 0.001986089 |
| Cl     | 0.004520219  | 0.001465124  | 0.000397691 |
| Cl     | -0.004409689 | 0.001727721  | 0.000688904 |
| C      | -0.001185501 | 0.003401485  | 0.001272643 |
| N      | 0.000513174  | -0.000854524 | 0.000223653 |

---

|   |              |              |             |
|---|--------------|--------------|-------------|
| C | 0.001036602  | 0.003297447  | 0.001045568 |
| N | -0.000568670 | -0.000863401 | 0.000280860 |

---
